# Supplementary material for: Duplex DNA engagement and RPA oppositely regulate the DNA-unwinding rate of CMG helicase
Source: Nat Commun. 2020 Jul 24;11:3713. doi: 10.1038/s41467-020-17443-7 (PMC7382467; doi:10.1038/s41467-020-17443-7)
Supplement: Supplementary file 1 — Supplementary Information [file 41467_2020_17443_MOESM1_ESM.pdf]

Supplementary Information File for:

**Duplex DNA engagement and RPA oppositely  
regulate the DNA unwinding rate of CMG  
helicase**

Kose, et al.

# Supplementary Figure 1

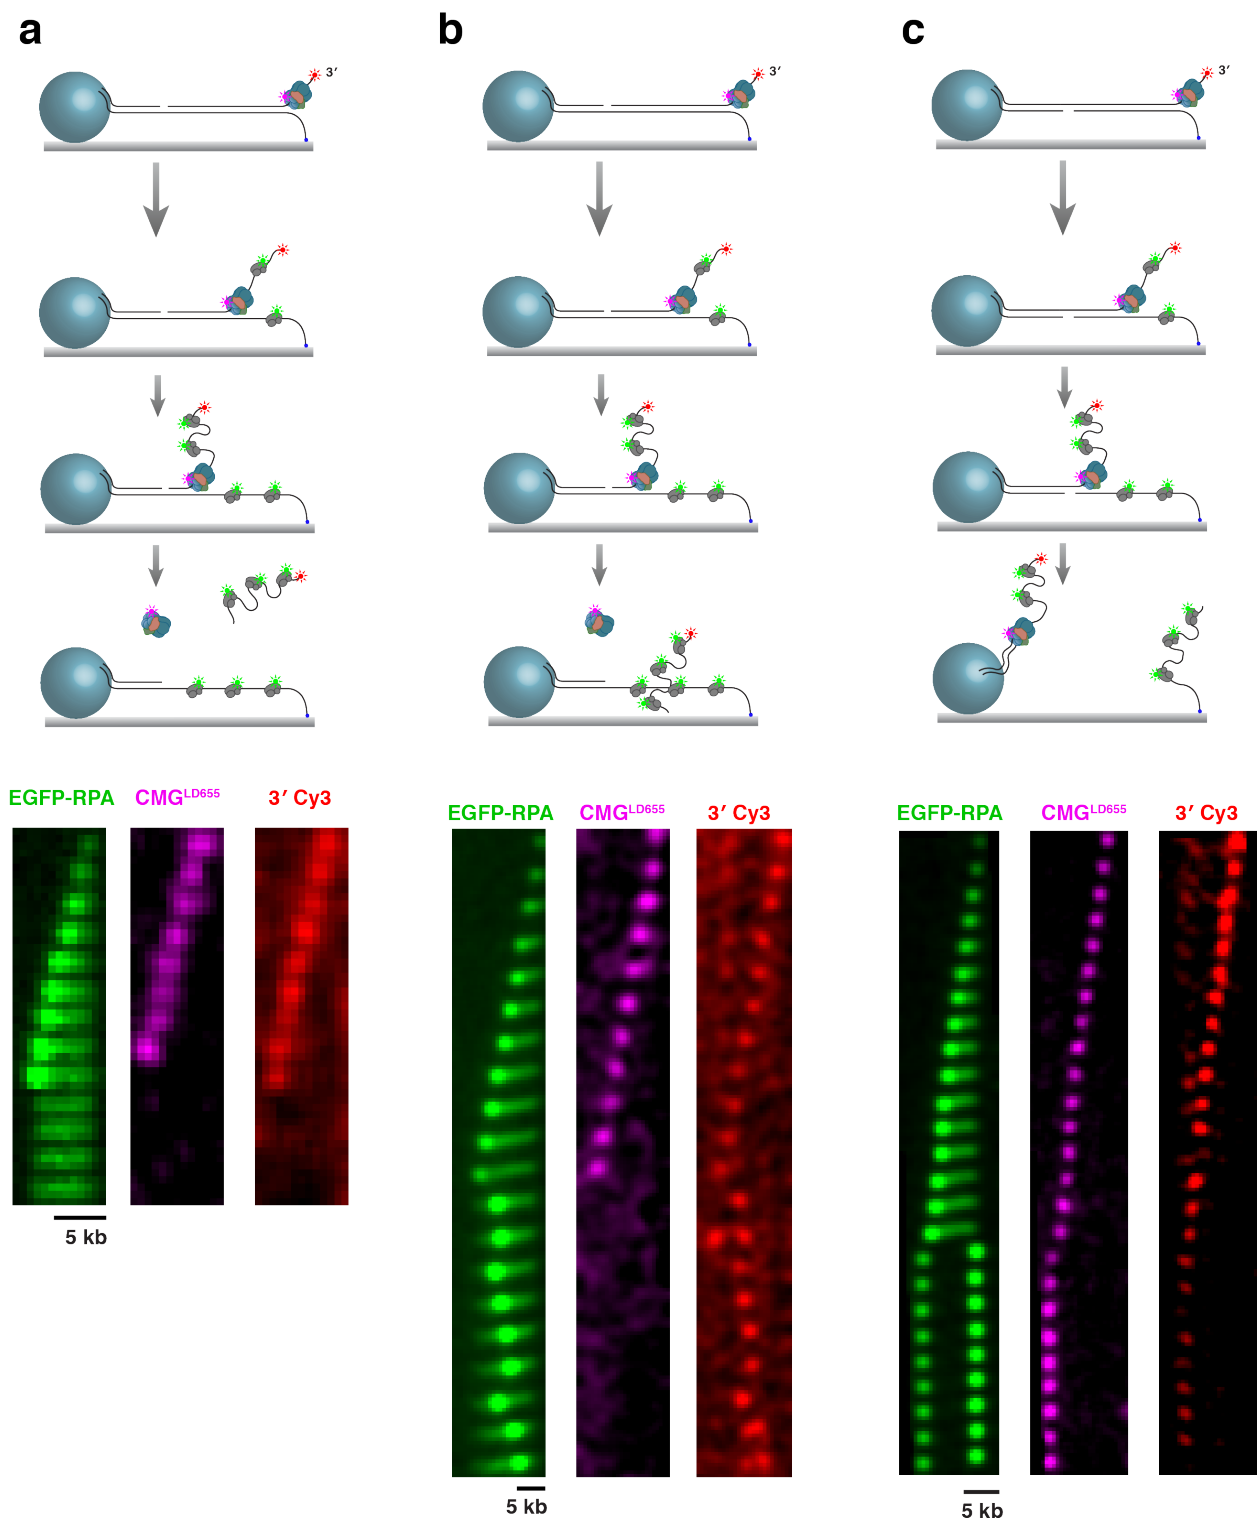

**Supplementary Figure 1. Single-molecule visualization of processive DNA unwinding by CMG.** **a-b**, Cartoon depictions of CMG meeting a nick on the leading-strand template. The leading-strand template either dissociates from **(a)** or diffuses along **(b)** the surface-immobilized DNA. Bottom images show corresponding example events. CMG does not remain on the translocation strand in **b** suggesting that it runs off the free 5' end. **c**, CMG collides with a lagging-strand nick resulting in breakage of DNA. CMG remains on DNA. Bottom images show an example event for CMG encountering a lagging-strand nick.

## Supplementary Figure 2

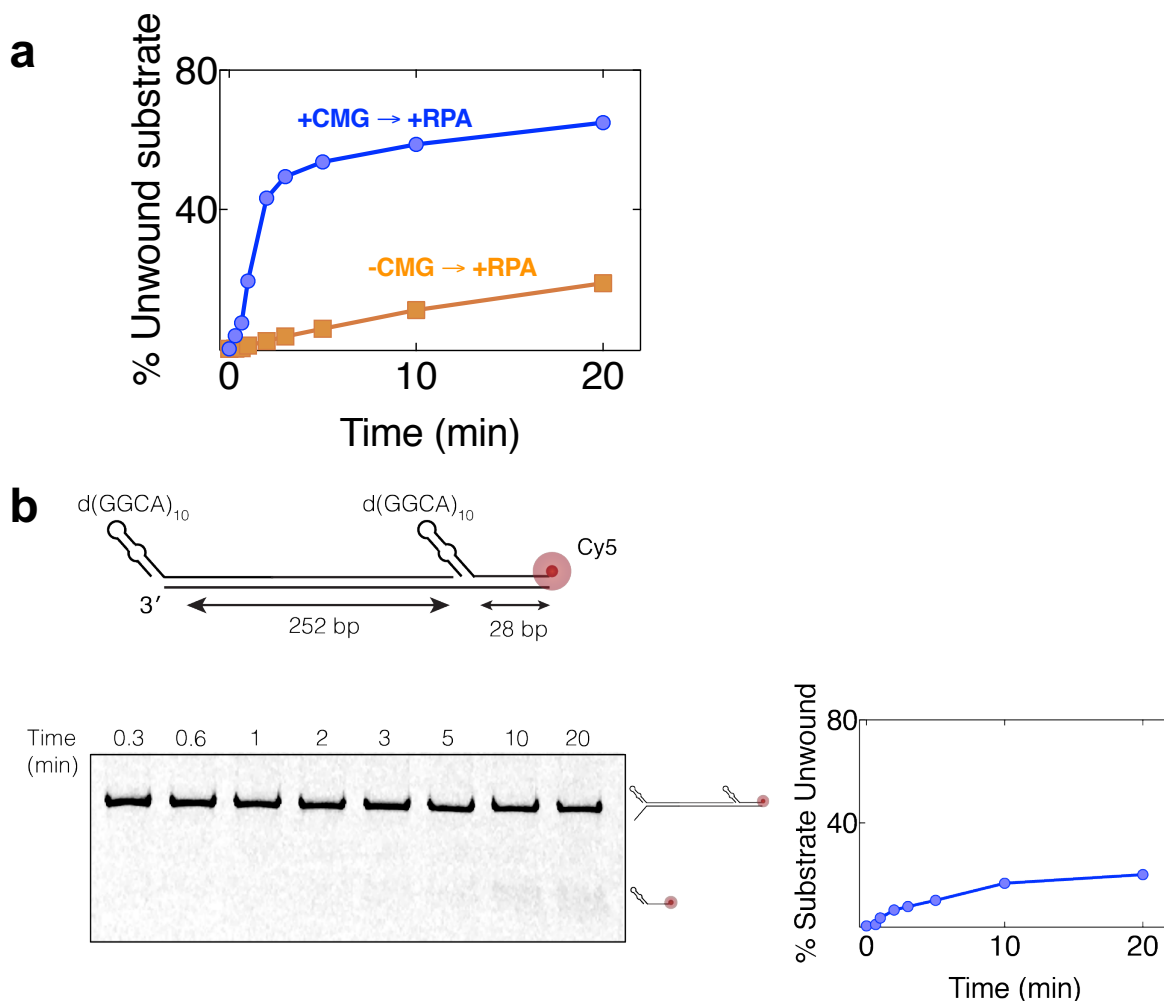

**Supplementary Figure 2. Displacement of the Cy5-modified oligonucleotide downstream of 252-bp dsDNA is dependent on CMG binding to the upstream 3' dT<sub>40</sub> ssDNA.** **a**, The same fork DNA used in Figure 2c was incubated in buffer containing or lacking CMG. RPA was then added together with ATP. RPA displaced Cy5-labelled strand to some extent even in the absence of CMG. The percentage of DNA unwound by RPA alone (-CMG→+RPA) was subtracted from that by CMG and RPA (+CMG→+RPA) to determine CMG-mediated unwinding in the presence of RPA. The data plotted in Figure 2e demonstrates measurements after this correction. **b**, The DNA substrate containing 252-bp long dsDNA, followed by 28-bp duplex and Cy5-modification on the excluded strand was incubated with CMG in the presence of ATPγS. This substrate lacked 3' dT<sub>40</sub> ssDNA overhang. Following CMG incubation with DNA, ATP and RPA were added, and the reaction was further incubated at 30°C for indicated periods of time. The right panel demonstrates the percentage of strand displacement displaced as a function of time as quantified from the gel. Cy5-modified strand was displaced to the same degree as the reaction lacking CMG in Figure S2A (-CMG→+RPA) indicating that CMG binding to 3' dT<sub>40</sub> upstream of the 252-bp dsDNA was needed for CMG-mediated unwinding. This experiments was done only once. Source data are provided as a Source Data file.

# Supplementary Figure 3

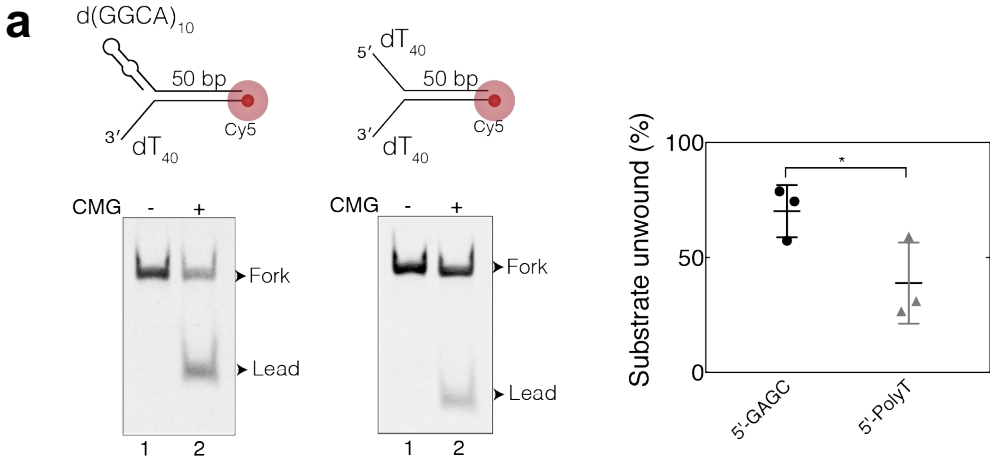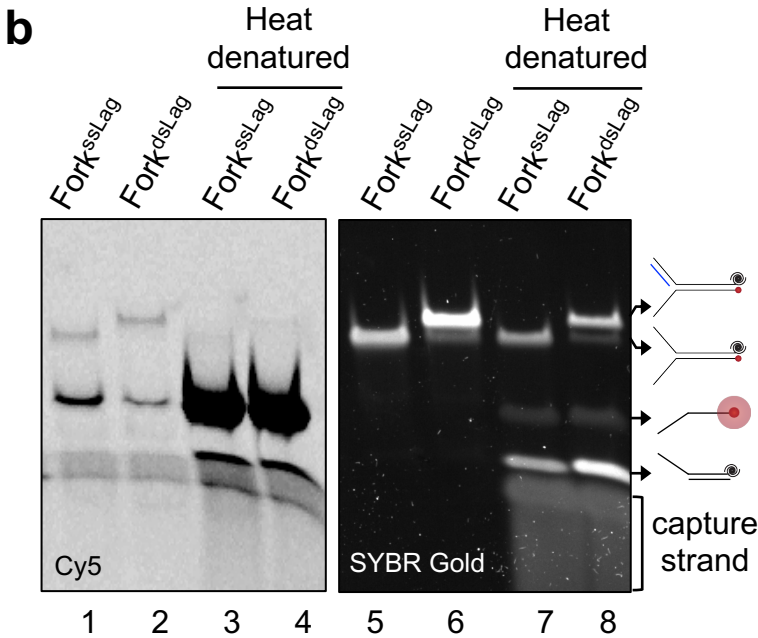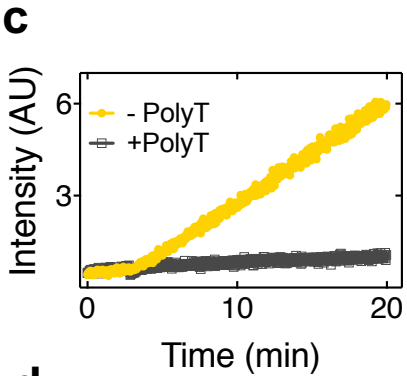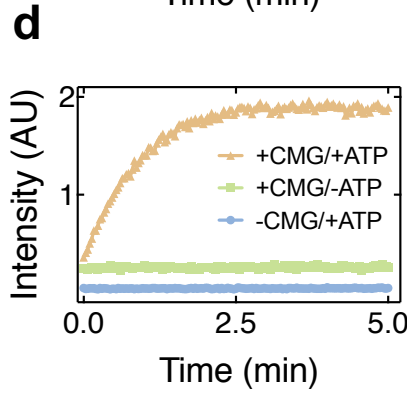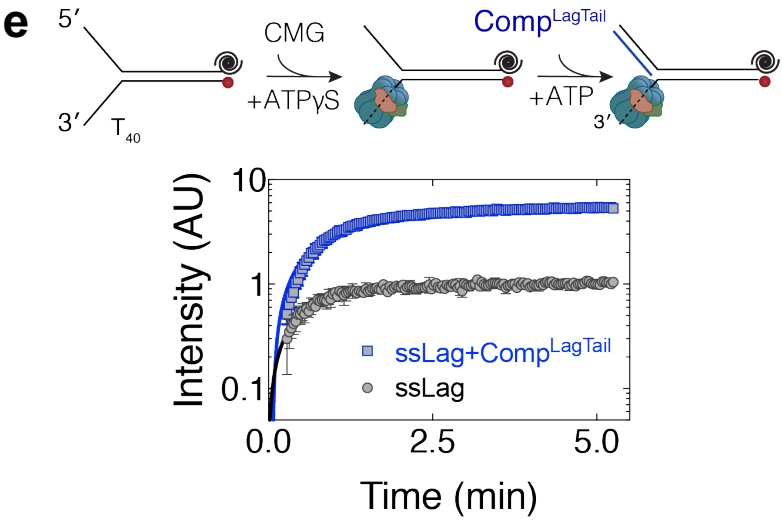

**Supplementary Figure 3. The impact of the lagging-strand arm on CMG helicase activity.** **a**, Fork DNA containing 3' dT<sub>40</sub>, 50-bp duplex, 5' leading-strand Cy5, and either dT<sub>40</sub> or d(GAGC)<sub>10</sub> lagging-strand arm was unwound by CMG and separated on 8% PAGE. The right panel shows quantification of DNA unwound (mean  $\pm$  SD, n=3). Statistical testing; One-way ANOVA with Tukey's test. \*, p=0.0357. **b**, Cy5/BHQ2-labelled fork DNA containing either single-stranded (Fork<sup>ssLag</sup>) or double-stranded (Fork<sup>dsLag</sup>) lagging-strand arm was separated on 8% PAGE. Fluorescence of Cy5-labelled strand is quenched and increases upon heat denaturation (compare lanes, 1-2 and 3-4). The right panel shows the same gel visualized under UV after SYBR Gold staining. A capture strand complementary to the BHQ2-modified strand was included in heat-denatured samples to prevent reannealing. This experiment was done only once. **c**, CMG was mixed with ATP and Cy5/BHQ2-labelled Fork<sup>dsLag</sup> in the absence (grey) or presence (yellow) of free dT<sub>40</sub> oligonucleotide. Excess dT<sub>40</sub> prevents CMG binding to fork DNA and subsequent unwinding. **d**, Time-dependent fluorescence intensity of Cy5/BHQ2-labelled Fork<sup>dsLag</sup> containing 28-bp parental duplex. Fluorescence increase is strictly dependent on the presence of CMG during ATP $\gamma$ S incubation as well as subsequent ATP addition. **e**, Cy5/BHQ2-labelled Fork<sup>ssLag</sup> was pre-incubated with CMG. ATP solution with (blue) or without (black) an oligonucleotide complementary to the 22-nt lagging-strand tail (Comp<sup>LagTail</sup>) was added, and fluorescence intensity was measured. The data represent mean  $\pm$  SD (n=3 independent experiments). Source data are provided as a Source Data file.

## Supplementary Figure 4

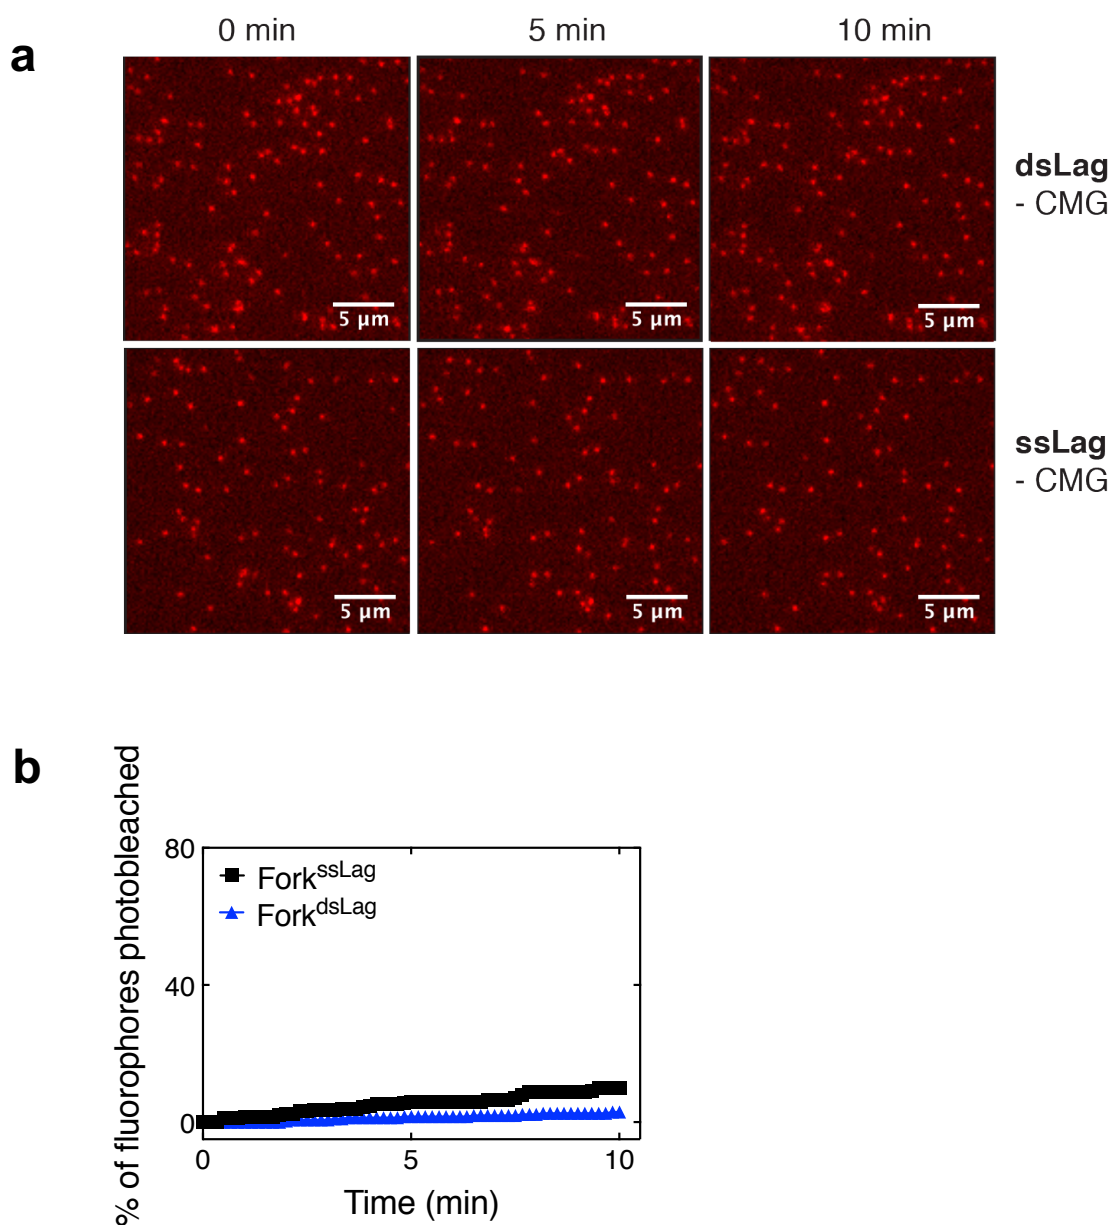

**Supplementary Figure 4. Photostability of Atto647N fluorophore.** **a**, Atto647N-labelled fork DNA was immobilized and imaged under the same experimental conditions for DNA unwinding assay (Figure 4) except CMG was omitted from ATP $\gamma$ S buffer. This experiment was repeated independently two times with similar results. **b**, Percentage of Atto647N spots photobleached as a function of time (Fork<sup>ssLag</sup> N=251 molecules, Fork<sup>dsLag</sup> N=306 molecules, each from two independent experiments). Source data are provided as a Source Data file.

## Supplementary Figure 5

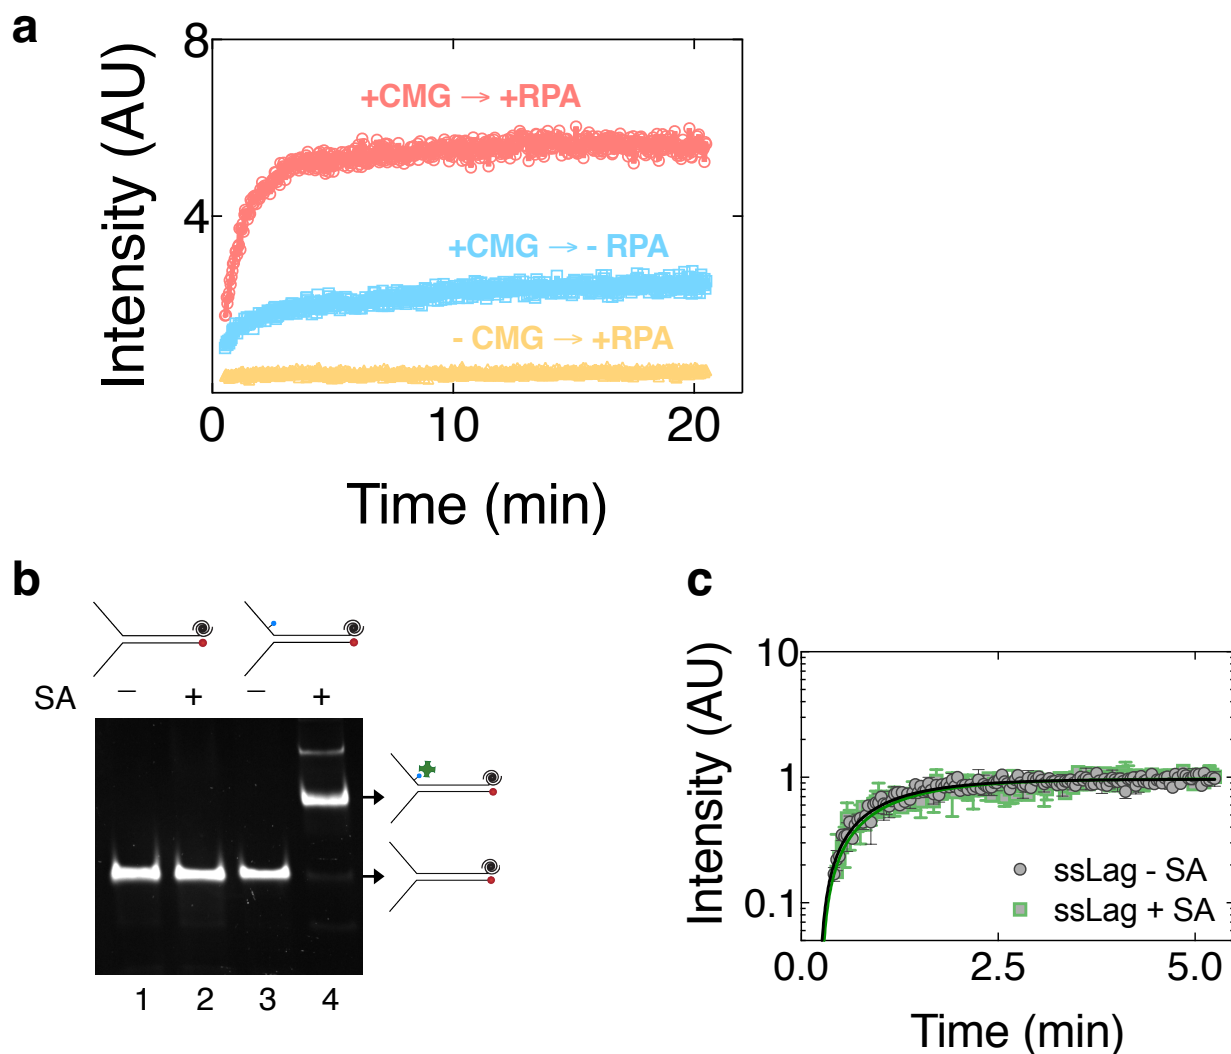

### Supplementary Figure 5. Binding of a protein to the lagging-strand arm of fork DNA.

**a**, Fork<sup>ssLag</sup> was incubated with buffer containing or lacking CMG in the presence of ATP $\gamma$ S for 90 minutes. Buffer or RPA was subsequently added and incubated for 10 minutes. ATP was then added to initiate CMG translocation. A competitor oligonucleotide was included with ATP addition to prevent further RPA and CMG binding during unwinding. When CMG was pre-bound to the fork, addition of RPA stimulated unwinding (compare +CMG $\rightarrow$ +RPA to +CMG $\rightarrow$ -RPA) similar to shown in Figure 5. Importantly, when CMG was omitted from the reaction, addition of RPA did not lead to detectable unwinding (-CMG $\rightarrow$ +RPA). **b**, Binding of streptavidin (SA) to the lagging-strand biotin on fork DNA is monitored by separating DNA on 8% PAGE and subsequent staining with SYBR Gold. Addition of streptavidin to biotin-modified fork leads to mobility shift (lane 4). This experiment was done only once. **c**, CMG-catalyzed single turn-over unwinding of fork DNA lacking a biotin on the lagging-strand arm in the absence (black) and presence (green) of streptavidin (SA). Data represent mean  $\pm$  SD (n=3 independent experiments). Source data are provided as a Source Data file.

# Supplementary Figure 6

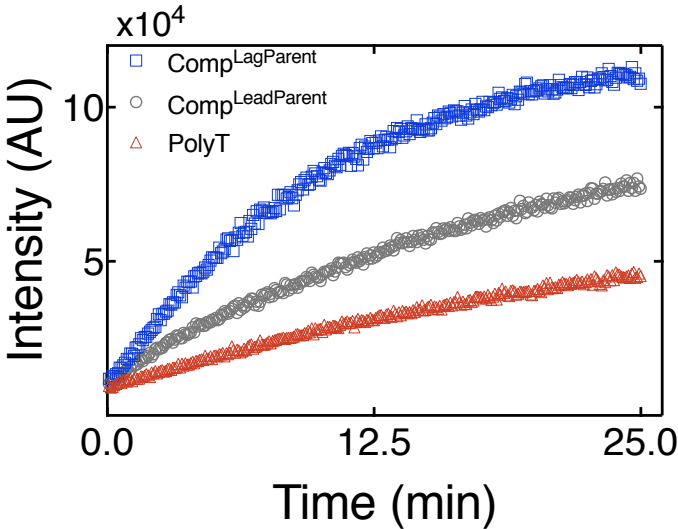

**Supplementary Figure 6. The impact of  $\text{Comp}^{\text{LeadParent}}$  on DNA unwinding activity by CMG.** Single turn-over unwinding of fork DNA used in Figure 6b containing 60-bp duplex region and hairpin lagging-strand arm. CMG was bound to the fork in the presence of  $\text{ATP}\gamma\text{S}$ . Subsequently ATP was added and unwinding was monitored through Cy5 fluorescence. An oligonucleotide complementary to either the lagging- ( $\text{Comp}^{\text{LagParent}}$ ) or the leading-template ( $\text{Comp}^{\text{LeadParent}}$ ) within the duplex region or 40-nt long polyT oligonucleotide was added with ATP. Source data are provided as a Source Data file.

# Supplementary Figure 7

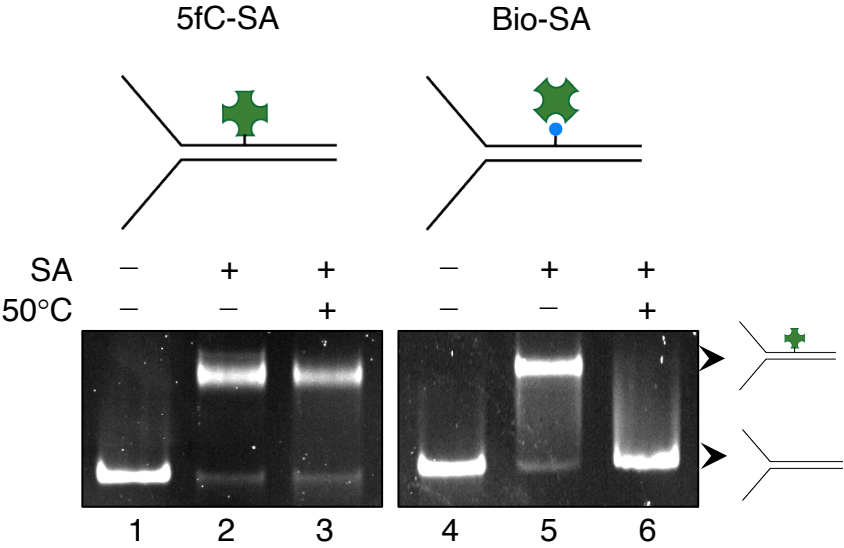

**Supplementary Figure 7. 5-Formyl-cytosine-streptavidin crosslinked fork DNA substrate.** Fork DNA containing either 5-formyl-cytosine-streptavidin (5fC-SA) crosslink (lane 2) or biotin-streptavidin (bio-SA) complex (lane 4) was heated to 50°C for 10 minutes in the presence of 1  $\mu$ M 5fC-modified oligonucleotide or 1  $\mu$ M free biotin, respectively, and separated on 8% PAGE. While streptavidin dissociated from biotin upon heat treatment (lane 6), 5fC-SA crosslink remained stable (lane 3). Source data are provided as a Source Data file.

**Supplementary Table 1. Oligonucleotides used in each DNA substrate.**

| <b>Substrate Name</b>                             | <b>Oligonucleotides Used</b>                                            | <b>Associated Figures</b>        |
|---------------------------------------------------|-------------------------------------------------------------------------|----------------------------------|
| 236-bp fork template<br>(internally Cy5 labelled) | Oligo-2, Oligo-3, Oligo-4, Oligo-5                                      | Fig. 2a                          |
| 252-bp fork template<br>(3'-Cy5)                  | Oligo-2, Oligo-17, Oligo-4, Oligo-5, Oligo-15,<br>Oligo-16, Oligo-Cy5-6 | Fig. 2c-d,<br>Supp. Fig. 2a      |
| 252-bp fork template<br>lacking 3'-PolyT tail     | Oligo-2, Oligo-3, Oligo-4, Oligo-18, Oligo-15,<br>Oligo-16, Oligo-Cy5-6 | Supp. Fig. 2b                    |
| Fork <sup>ssLag</sup>                             | Oligo-BHQ2-2, Oligo-Cy5-4                                               | Fig. 3, 5a, 6a,<br>Supp. Fig. 3e |
| Fork <sup>dsLag</sup>                             | Oligo-12, Oligo-BHQ2-2, Oligo-Cy5-4                                     | Fig. 3, 5b,<br>Supp. Fig. 3b-d   |
| Fork <sup>ssLag</sup> -Bio                        | Oligo-BHQ2-Bio, Oligo-Cy5-4                                             | Fig. 5c, Supp.<br>Fig. 5b        |
| Fork-5'-PolyT                                     | Oligo-Bio-2, Oligo-Cy5-5                                                | Supp. Fig. 3a                    |
| Fork-5'-GAGC                                      | Oligo-Bio-1, Oligo-Cy5-5                                                | Supp. Fig. 3a                    |
| Fork <sup>ssLag</sup> -TIRF                       | Oligo-Atto, Oligo-19, Oligo-Bio-5                                       | Fig. 4, Supp.<br>Fig. 4          |
| Fork <sup>dsLag</sup> -TIRF                       | Oligo-Atto, Oligo-19, Oligo-Bio-5, Oligo-12                             | Fig. 4, Supp.<br>Fig. 4          |
| 60-bp fork with 5'-<br>GAGC                       | Oligo-11, Oligo-BHQ2-1, Oligo-Cy5-1                                     | Fig. 6b                          |
| Fork (5fC-SA<br>crosslink)                        | Oligo-5fC-1, Oligo-9, Oligo-14, Oligo-IBRQ                              | Fig. 7                           |
| Fork (no crosslink)                               | Oligo-7, Oligo-14, Oligo-Cy5-2, Oligo-IBRQ                              | Fig. 7                           |
| Fork-Bio-SA                                       | Oligo-10, Oligo-Bio-3, Oligo-Cy5-3                                      | Supp. Fig. 6                     |
| 10kb-substrate (TIRF)                             | pUC19 as the PCR template, Oligo-Bio-4,<br>Oligo-Cy3, Oligo-1, Oligo-8  | Fig. 1, Supp.<br>Fig. 1          |

**Supplementary Table 2. Sequences of oligonucleotides used to prepare DNA substrates.**

|                |                                                                                                                       |
|----------------|-----------------------------------------------------------------------------------------------------------------------|
| Oligo-1        | ATGCCGGGAGCAGACAAGCCCGTC                                                                                              |
| Oligo-2        | CCTCCAAAAAAGCCTCCTACTA                                                                                                |
| Oligo-3        | CTGGCTTA ACTATGCGGCATCAG                                                                                              |
| Oligo-4        | [5'-Phos]GGCAGGCAGGCAGGCAGGCAGGCAGGCAGGCAGGCAGGCAGGTGGCGAATTCCCATTGCC                                                 |
| Oligo-5        | CATGGGCAATGGGAATTCGCCAACCTTTTTTTTTTTTTTTTTTTTTTTTTTTTTTTT                                                             |
| Oligo-6        | TTTTTTTTTTTTTTTTTTTTTTTTTTTTTTTTTTTTTTTTTTTTTTTTTTTTTTTT                                                              |
| Oligo-7        | GGCAGGCAGGCAGGCAGGCAGGCAGGCAGGCAGGCAGGCAGGCAGGTGGCGAATTC                                                              |
| Oligo-8        | ATGGGCCAGCTGGCACGACAGTTTCCCG                                                                                          |
| Oligo-9        | GGCAGGCAGGCAGGCAGGCAGGCAGGCAGGCAGGCAGGCAGGCAGGTGGCGAATTCCCATTG                                                        |
| Oligo-10       | GCTCGTTTTACAACGTCGTGCTGAGGTACCGGATGCTGAGGCAATGGGAATTCGCCAACCTTTTTTTTTTTTTTTTTTTTTTTTTTTTTTTTTTTTTTTTTTTTTTTTTTTTTTTTT |
| Oligo-11       | GGCAGGCAGGCAGGCAGGCAGGCAGGCAGGCAGGCAGGCAGGCAGGCAGGTGGCGAATTCCCATTGCCTCAGCATCCGGTACC                                   |
| Oligo-12       | CGCTGTCTGTTCCCTTCTTGTC                                                                                                |
| Oligo-13       | GCTCTTTGTTCCCT                                                                                                        |
| Oligo-14       | [5'-Phos]TCGCCAACCTTTTTTTTTTTTTTTTTTTTTTTTTTTTTTTTTTTTTTTTTTTTTTTTTTTTTTTTT                                           |
| Oligo-15       | [5'-Phos]AGCTACTCCAGCGGCGGG                                                                                           |
| Oligo-16       | GCTCTTTGTTCCCTTCTCCTGTCCTTCCTTTCCCGCCGCTGGAGT                                                                         |
| Oligo-17       | TCCTAAGCTTACTGGCTTA ACTATGCGGCATCAG                                                                                   |
| Oligo-18       | CATGGGCAATGGGAATTCGCCAACCTTTTTTTTTTTTTTTTTTTTTTTTTTTTTTTTTTTTTTTTTTTTTTTTTTTTTTTTT                                    |
| Oligo-19       | CATGCCACACACCGAGACACAC                                                                                                |
| Oligo-20       | CCGGATGCTGAGGCAATGGGAATTCGCCAACC                                                                                      |
| Oligo-21       | AGGAAGGACAGGAGAAGGAACAAAGAGC                                                                                          |
| Oligo-22       | GGTTGGCGAATTCCCATTGCCTCAGCATC                                                                                         |
| Oligo-BHQ2-1   | [5'-Phos]TCAGCACGACGTTGTAAAACGAGC[3'-BHQ2]                                                                            |
| Oligo-BHQ2-2   | GACAAGAAGGGAACAGACAGCGAGGAAGGACAGGAGAAGGAACAAAGAGC[3'-BHQ2]                                                           |
| Oligo-BHQ2-Bio | GACAAGAAGGGAACAGA[Biotin-dT]AGCGAGGAAGGACAGGAGAAGGAACAAAGAGC[3'-BHQ2]                                                 |

|             |                                                                                                                                             |
|-------------|---------------------------------------------------------------------------------------------------------------------------------------------|
| Oligo-Bio-1 | TTTTTTTTTTTTTTTTTTTTTTTTTTTTTTTTTTTGACGCTGCCGAATTCTGGC<br>TTGC[Biotin-dT]AGGACATTACAGGATCGTTCGGTCTC                                         |
| Oligo-Bio-2 | GGCAGGCAGGCAGGCAGGCAGGCAGGCAGGCAGGCAGGCAGACGCTGCCGAA<br>TTCTGGCTTGC[Biotin-dT]AGGACATTACAGGATCGTTCGGTCTC                                    |
| Oligo-Bio-3 | GGCAGGCAGGCAGGCAGGCAGGCAGGCAGGCAGGCAGGCAGGCAGGTTGGCGAATT<br>CCCATTGCCTCAGCA[Biotin-dT]CCGGTACC                                              |
| Oligo-Bio-4 | [5'-<br>BiotinTEG]GACAAGAAGGGAACAGACAGCGAGGAAGGACAGGAGAAGGAACAAA<br>GAGC                                                                    |
| Oligo-Bio-5 | [5'-<br>BiotinTEG]ATTCGTCTGCCTGCTTCGTCGTCTCTTGTGTGTCTCGGTGTGTGGCAT<br>GGCTCTTTGTTCTTCTCCTGTCCTTCCTTTTTTTTTTTTTTTTTTTTTTTTTTTT<br>TTTTTTTTTT |
| Oligo-Cy3   | [5'-<br>Phos]AGGTCGCCGCCCGCTCTTTGTTCTTCTCCTGTCCTTCCTTTTTTTTTTTT[Cy3-<br>dT]TTTTTTTTTTTTTTTTTTTTTTTTTTTTTTTTTTTTTTTTTTTTTTTTTTTTTT           |
| Oligo-Cy5-1 | [5'-<br>Cy5]GCTCGTTTTACAACGTCGTGCTGAGGTACCGGATGCTGAGGCAATGGGAAT<br>TCGCCAACCTTTTTTTTTTTTTTTTTTTTTTTTTTTTTTTTTTTTTTTTTTTTTTTTTTT             |
| Oligo-Cy5-2 | [5'-Phos]CCATTGCCTCAGCATCCGGTACCTCAGCACGACGTTGTAAAACGAGC[3'-<br>Cy5]                                                                        |
| Oligo-Cy5-3 | [5'-Phos]TCAGCACGACGTTGTAAAACGAGC[3'-Cy5]                                                                                                   |
| Oligo-Cy5-4 | [5'-<br>Cy5]GCTCTTTGTTCTTCTCCTGTCCTTCCTTTTTTTTTTTTTTTTTTTTTTTTTTTTTTT<br>TTTTTTTTTTTT                                                       |
| Oligo-Cy5-5 | [5'-<br>Cy5]GAGACCGAACGATCCTGTAATGTCCTAGCAAGCCAGAATTCGGCAGCGTCTT<br>TTTTTTTTTTTTTTTTTTTTTTTTTTTTTTTTTTTTTTTTTTTTTTTTTTTTTT                  |
| Oligo-Cy5-6 | GGCAGGCAGGCAGGCAGGCAGGCAGGCAGGCAGGCAGGCAGGCAGGAAGGACAGGA<br>GAAGGAACAAAGAGC[3'-Cy5]                                                         |
| Oligo-5fC   | [5'-Phos]CCTCAGCAT[5Formyl-<br>dC]CCGTACCTCAGCACGACGTTGTAAAACGAGC[3'-Cy5]                                                                   |
| Oligo-IBRQ  | [5'-Iowa Black<br>RQ]GCTCGTTTTACAACGTCGTGCTGAGGTACCGGATGCTGAGGCAATGGGAAT                                                                    |
| Oligo-Atto  | [5'-Atto647N]-<br>TGACAAGAAGGGAACAGACAGCGAGGAAGGACAGGAGAAGGAACAAAGAGC                                                                       |
